# Supplementary material for: Renal Function in Nucleos(t)ide Analog-Treated Patients With Chronic Hepatitis B: A Systematic Literature Review and Network Meta-Analysis
Source: PubMed Central journal article supplement — Adv Ther. 2016 May 4;33(5):862–75. doi: 10.1007/s12325-016-0337-2 (PMC4882346; doi:10.1007/s12325-016-0337-2), 2016-05-04
Supplement: 12325_2016_337_MOESM1_ESM.pdf [file 12325_2016_337_MOESM1_ESM.pdf]

**SUPPLEMENTARY MATERIAL**

**Table S1. Demographic and disease characteristics of patients enrolled in the included studies.**

| Study                 | Country                                           | Study duration/<br>period | Intervention            | N   | Age (years),<br>mean (SD)/<br>median<br>(range) | eGFR<br>equation | Baseline eGFR (mL/min),<br>mean (SD)/median (range) |
|-----------------------|---------------------------------------------------|---------------------------|-------------------------|-----|-------------------------------------------------|------------------|-----------------------------------------------------|
|                       |                                                   |                           | Comparator              |     |                                                 |                  |                                                     |
| Izzedine 2004 [1]     | International                                     | 64 weeks                  | Adefovir                | 171 | 34 (11.2)                                       |                  |                                                     |
|                       |                                                   |                           | Placebo                 | 167 | 37 (11.8)                                       |                  |                                                     |
| Chan 2012 [2]         | International                                     | 104 weeks                 | Telbivudine             | 114 | 49.6 (10.9)                                     |                  |                                                     |
|                       |                                                   |                           | Lamivudine              | 114 | 51.9 (10.0)                                     |                  |                                                     |
| Gane 2014 [3]         | International                                     | 104 weeks                 | Telbivudine             | 680 |                                                 | MDRD             | 103.2 (1.2)                                         |
|                       |                                                   |                           | Lamivudine              | 687 |                                                 |                  | 104.5 (1.1)                                         |
| Ha 2009 [4]           | USA                                               | 2002–2008                 | Adefovir                | 145 | 46.7 (11.8)                                     | CG and MDRD      | 87.2 (19.3)                                         |
|                       |                                                   |                           | Entecavir               | 145 | 46.2 (11.6)                                     |                  | 89.3 (17.8)                                         |
| Gish 2012 [5]         | USA                                               | 2004–2010                 | Tenofovir               | 80  | 54.3 (13)                                       | MDRD             | 84.41 (28.19–194.35)                                |
|                       |                                                   |                           | Entecavir               | 80  | 55.1 (12)                                       |                  | 87.72 (26.07–241.65)                                |
| Tsai 2016 [6]         | Taiwan                                            | 2006–2012                 | Tenofovir               | 170 | 51.8 (11.9)                                     | MDRD             | 92.0                                                |
|                       |                                                   |                           | Telbivudine             | 184 | 54.2 (14.6)                                     |                  | 86.1                                                |
|                       |                                                   |                           | Entecavir               | 233 | 52.8 (12.4)                                     |                  | 81.1                                                |
| Ha 2015 [7]           | USA                                               | 2008–2012                 | Tenofovir               | 103 | 43.5 (10.4)                                     |                  |                                                     |
|                       |                                                   |                           | Entecavir               | 103 | 43.8 (10.7)                                     |                  |                                                     |
|                       |                                                   |                           |                         |     |                                                 |                  |                                                     |
| Lee 2014 [8]          | Korea                                             | 24 months                 | Adefovir + telbivudine  | 43  | 52.33 (11.22)                                   | CKD-EPI          |                                                     |
|                       |                                                   |                           | Adefovir + lamivudine   | 297 | 51.4 (11.88)                                    |                  |                                                     |
|                       |                                                   |                           | Adefovir + entecavir    | 59  | 53.66 (10.43)                                   |                  |                                                     |
|                       |                                                   |                           | Adefovir                | 140 | 50.61 (10.78)                                   |                  |                                                     |
|                       |                                                   |                           | Entecavir               | 292 | 52.76 (11.26)                                   |                  |                                                     |
| Tsai 2014 [9]         | Taiwan                                            | 24 months                 | Telbivudine             | 115 | 52.9 (12.4)                                     | MDRD             | 81.37                                               |
|                       |                                                   |                           | Entecavir               | 115 | 53.6 (12.1)                                     |                  | 77.20                                               |
| Piratvisuth 2013 [10] | Argentina,<br>Brazil,<br>Germany, and<br>Thailand | 24 months                 | Telbivudine             | 55  | 37 (10.4)                                       | MDRD             | 93.4 (15.1)                                         |
|                       |                                                   |                           | Telbivudine + tenofovir | 45  | 40 (15)                                         |                  | 92.1 (18.5)                                         |
| Koklu 2015 [11]       | Turkey                                            | 24 months                 | Lamivudine              | 302 | 49.21 (13.17)                                   | MDRD             |                                                     |
|                       |                                                   |                           | Entecavir               | 282 | 49.86 (13.35)                                   |                  |                                                     |
|                       |                                                   |                           | Tenofovir               | 273 | 47.74 (12.45)                                   |                  |                                                     |

|                       |                     |            |                       |     |              |                  |                    |
|-----------------------|---------------------|------------|-----------------------|-----|--------------|------------------|--------------------|
| Mauss 2011 [12]       | Germany             | 48 months  | Lamivudine            | 36  | 41 (18–68)   | MDRD             | 107 (72–127)       |
|                       |                     |            | Adefovir              | 32  | 38 (18–63)   |                  | 108 (77–134)       |
|                       |                     |            | Entecavir             | 32  | 43 (20–73)   |                  | 108 (52–128)       |
|                       |                     |            | Tenofovir             | 37  | 43 (19–75)   |                  | 103 (65–133)       |
|                       |                     |            | No treatment          | 60  | 39 (21–62)   |                  | 108 (47–139)       |
| Qi 2015 [13]          | China               | 36 months  | Lamivudine            | 50  | 53.5 (23–66) | MDRD and CKD-EPI | 106.1 (67–172.5)   |
|                       |                     |            | Adefovir              | 60  | 49 (24–70)   |                  | 102.8 (71.7–149.8) |
|                       |                     |            | Telbivudine           | 68  | 33.5 (21–64) |                  | 105.1 (69.2–166.1) |
|                       |                     |            | Entecavir             | 61  | 42 (19–64)   |                  | 99.9 (6.1–163)     |
|                       |                     |            | No treatment          | 36  | 31 (21–59)   |                  | 109.4 (68.7–131.5) |
| Tien 2015 [14]        | USA                 | >18 months | Entecavir             | 44  | 51 (9)       | CG and MDRD      | 102 (22)           |
|                       |                     |            | Tenofovir             | 42  | 49 (12)      |                  | 103 (26)           |
|                       |                     |            | No treatment          | 60  | 46 (12)      |                  | 118 (28)           |
| Chen 2013 [15]        | Taiwan              | 2 weeks    | Telbivudine           | 9   | 48 (29–65)   | MDRD and CKD-EPI | 112 (77.8–148)     |
|                       |                     |            | Entecavir             | 12  | 47 (28–71)   |                  | 110.6 (52.9–156.7) |
| Cholongitas 2015 [16] | Greece              | 25 months  | Entecavir             | 21  | 58 (9)       |                  |                    |
|                       |                     |            | Tenofovir             | 31  | 60 (10)      |                  |                    |
| Nguyen 2011 [17]      | UK                  | 12 months  | Tenofovir             | 212 |              |                  |                    |
|                       |                     |            | Entecavir             | 79  |              |                  |                    |
| Le 2012 [18]          | Australia           | 24 months  | Tenofovir             | 50  |              |                  |                    |
|                       |                     |            | Entecavir             | 74  |              |                  |                    |
| Su 2013 [19]          | Taiwan              | 2003–2011  | Lamivudine            | 77  | 49.48        | MDRD             | 86.58 (25.13)      |
|                       |                     |            | Entecavir             | 200 | 50.95        |                  | 106.07 (36.91)     |
|                       |                     |            | Telbivudine           | 31  | 42.03        |                  | 117.23 (42.7)      |
|                       |                     |            | Lamivudine + adefovir | 57  | 54.63        |                  | 86.96 (22.96)      |
| Lee 2015 [20]         | South Korea         | 18 months  | Telbivudine           | 578 | 53.6 (10.9)  | MDRD             | 89.1 (19.9)        |
|                       |                     |            | Entecavir             | 116 | 54.8 (11.3)  |                  | 89 (18.6)          |
| Hu 2015 [21]          | Taiwan              | 44 months  | Tenofovir             | 170 |              |                  | 92.2               |
|                       |                     |            | Telbivudine           | 184 |              |                  | 86.1               |
|                       |                     |            | Entecavir             | 233 |              |                  | 80.5               |
| Tsai 2014a [22]       | Taiwan              | 12 months  | Telbivudine           | 115 |              | MDRD             | 78 (22.9)          |
|                       |                     |            | Tenofovir             | 162 |              |                  | 93 (27.4)          |
| Sriprayoon 2015 [23]  | Not reported        | 144 weeks  | Entecavir             | 200 | 41.6 (11.5)  |                  |                    |
|                       |                     |            | Tenofovir             | 200 | 41.2 (11.6)  |                  |                    |
| Krastev 2014 [24]     | Bulgaria and Turkey | 104 weeks  | Telbivudine           | 121 | 42.1 (11.5)  |                  |                    |
|                       |                     |            | Tenofovir             | 120 | 43.3 (12.6)  |                  |                    |

|                |        |          |                        |     |  |  |       |
|----------------|--------|----------|------------------------|-----|--|--|-------|
| Hung 2014 [25] | Taiwan | 24 weeks | Tenofovir              | 41  |  |  | 108   |
|                |        |          | Entecavir              | 148 |  |  | 92    |
| Sun 2014 [26]  | China  | 96 weeks | Telbivudine + adefovir |     |  |  | 119.7 |
|                |        |          | Telbivudine            |     |  |  | 108.9 |
|                |        |          | Adefovir               |     |  |  | 121.2 |

*CG* Cockcroft–Gault, *CKD-EPI* Chronic Kidney Disease Epidemiology Collaboration, *eGFR* estimated glomerular filtration rate, *MDRD* Modification of Diet in Renal Disease, *N* number of patients, *SD* standard deviation.

Blank cells indicate that the study does not report corresponding information; 26 of the 40 included studies reported demographic and baseline characteristics. Age and baseline eGFR values without brackets are means.

**Table S2. Sample size and mean eGFR change from baseline at 1 year as per treatment regimen.**

| <b>Treatment regimen</b> | <b>Total number of studies</b> | <b><i>N</i></b> | <b>Mean eGFR change (mL/min) from baseline at 1 year</b> |
|--------------------------|--------------------------------|-----------------|----------------------------------------------------------|
| Adefovir                 | 1                              | 60              | -6.92                                                    |
| Entecavir                | 7                              | 1442            | -1.14                                                    |
| Entecavir + adefovir     | 1                              | 35              | -3.58                                                    |
| Lamivudine               | 3                              | 410             | -2.56                                                    |
| Lamivudine + adefovir    | 3                              | 243             | -5.03                                                    |
| Telbivudine              | 8                              | 708             | 8.11                                                     |
| Telbivudine + adefovir   | 2                              | 115             | 2.45                                                     |
| Telbivudine + lamivudine | 1                              | 19              | 11.10                                                    |
| Telbivudine + tenofovir  | 2                              | 64              | 13.15                                                    |
| Tenofovir                | 4                              | 659             | -7.98                                                    |

*eGFR* estimated glomerular filtration rate, *N* number of patients.

**Table S3. Renal function results from randomized controlled trials.**

| Study             | Publication type    | Intervention | N   | Renal function results                                                                                                                                                                                                                                                                                                                                                                                                                                                                                                                                                                   |
|-------------------|---------------------|--------------|-----|------------------------------------------------------------------------------------------------------------------------------------------------------------------------------------------------------------------------------------------------------------------------------------------------------------------------------------------------------------------------------------------------------------------------------------------------------------------------------------------------------------------------------------------------------------------------------------------|
|                   |                     | Comparator   |     |                                                                                                                                                                                                                                                                                                                                                                                                                                                                                                                                                                                          |
| Krastev 2014 [24] | Conference abstract | Telbivudine  | 121 | eGFR change from baseline at week 104 in telbivudine-treated patients was 6.14. Twice as many telbivudine-treated patients with an abnormal eGFR (60 to <90 mL/min/1.73m <sup>2</sup> ) at baseline reverted to normal eGFR compared to tenofovir-treated patients: 23/39 (60.5%) versus 11/41 (27.5%) patients, respectively.                                                                                                                                                                                                                                                           |
|                   |                     | Tenofovir    | 120 | eGFR change from baseline at week 104 in tenofovir-treated patients was -3.00.                                                                                                                                                                                                                                                                                                                                                                                                                                                                                                           |
| Izzedine 2004 [1] | Journal article     | Adefovir     | 171 | There was no overall median change from baseline at week 48 in serum creatinine or serum phosphorus levels in the adefovir 10 mg group.                                                                                                                                                                                                                                                                                                                                                                                                                                                  |
|                   |                     | Placebo      | 167 | Serum creatinine increase and hypophosphatemia were more frequently observed in patients receiving adefovir 30 mg daily compared with adefovir 10 mg and placebo.                                                                                                                                                                                                                                                                                                                                                                                                                        |
| Chan 2012 [2]     | Journal article     | Telbivudine  | 114 | eGFR steadily improved in telbivudine-treated patients with the greatest improvement seen during the second year of treatment.                                                                                                                                                                                                                                                                                                                                                                                                                                                           |
|                   |                     | Lamivudine   | 114 | Lamivudine-treated patients showed a steady decline in eGFR.                                                                                                                                                                                                                                                                                                                                                                                                                                                                                                                             |
| Gane 2014 [3]     | Journal article     | Telbivudine  | 680 | In telbivudine-treated patients during the two-year GLOBE study, mean eGFR increased by 8.5% based on MDRD equation. Improved renal function was maintained for 4–6 years. Increased eGFR with telbivudine treatment was also observed in patients at increased risk for renal impairment: patients with baseline eGFRs of 60–89 mL/min/1.73 m <sup>2</sup> (+17.2%), older than 50 years (+11.4%), and with liver fibrosis/cirrhosis (+7.2% for patients with Ishak fibrosis score 5–6). In decompensated patients with high renal risk, eGFR was also improved on telbivudine (+2.0%). |

|                      |                     |                        |     |                                                                                                                                                                                     |
|----------------------|---------------------|------------------------|-----|-------------------------------------------------------------------------------------------------------------------------------------------------------------------------------------|
|                      |                     | Lamivudine             | 687 | Renal function declined over time in lamivudine-treated patients.                                                                                                                   |
| Sriprayoon 2015 [23] | Conference abstract | Entecavir              | 200 | eGFR decrease $\geq 20\%$ was observed in 28/200 (13.6%) patients.                                                                                                                  |
|                      |                     | Tenofovir              | 200 | eGFR decrease $\geq 20\%$ was observed in 45/200 (22.5%) patients.                                                                                                                  |
| Park 2014 [27]       | Conference abstract | Telbivudine + adefovir | NR  | The proportion of patients with eGFR $\geq 90$ mL/min/1.73 m <sup>2</sup> treated with telbivudine + adefovir increased from 49.1% (26/53) at baseline to 58.5% (31/53) at week 48. |
|                      |                     | Lamivudine + adefovir  | NR  | The proportion of patients with eGFR $\geq 90$ mL/min/1.73 m <sup>2</sup> treated with lamivudine + adefovir decreased from 37.7% (26/53) at baseline to 30.2% (16/53) at week 48.  |

*eGFR* estimated glomerular filtration rate, *N* number of patients, *NR* not reported.

## REFERENCES

1. Izzedine H, Hulot JS, Launay-Vacher V, et al. Renal safety of adefovir dipivoxil in patients with chronic hepatitis B: two double-blind, randomized, placebo-controlled studies. *Kidney Int.* 2004;66:1153–8.
2. Chan HLY, Chen YC, Gane EJ, et al. Randomized clinical trial: efficacy and safety of telbivudine and lamivudine in treatment-naïve patients with HBV-related decompensated cirrhosis. *J Viral Hepat* 2012;19:732–43.
3. Gane EJ, Deray G, Liaw YF, et al. Telbivudine improves renal function in patients with chronic hepatitis b. *Gastroenterology* 2014;146:138–46.e5.
4. Ha NB, Ha NB, Garcia RT, et al. Renal dysfunction in chronic hepatitis B patients treated with adefovir dipivoxil. *Hepatology.* 2009;50:727–34.
5. Gish RG, Clark MD, Kane SD, Shaw RE, Mangahas MF, Baqai S. Similar risk of renal events among patients treated with tenofovir or entecavir for chronic hepatitis B. *Clin Gastroenterol Hepatol* 2012;10:941–6.
6. Tsai MC, Chen CH, Tseng PL, et al. Comparison of renal safety and efficacy of telbivudine, entecavir and tenofovir treatment in chronic hepatitis B patients: real world experience. *Clinical microbiology and infection: the official publication of the European Society of Clinical Microbiology and Infectious Diseases.* 2016;22:95.e1–7.
7. Ha NB, Ku K, Ha NB, Chaung KT, Trinh HN, Nguyen MH. Renal function in chronic hepatitis B patients treated with tenofovir disoproxil fumarate or entecavir monotherapy: a matched case-cohort study. *J Clin Gastroenterol.* 2015;49:873–7.
8. Lee M, Oh S, Lee HJ, et al. Telbivudine protects renal function in patients with chronic hepatitis B infection in conjunction with adefovir-based combination therapy. *J Viral Hepat* 2014;21:873–81.
9. Tsai MC, Chen CH, Hung CH, et al. A comparison of efficacy and safety of 2-year telbivudine and entecavir treatment in patients with chronic hepatitis B: a match-control study. *Clin Microbiol Infect* 2014;20:O90–100.
10. Piratvisuth T, Komolmit P, Tanwandee T, et al. 52-week efficacy and safety of telbivudine with conditional tenofovir intensification at week 24 in HBeAg-positive chronic hepatitis B. *PLoS One* 2013;8:e54279.
11. Koklu S, Gulsen MT, Tuna Y, et al. Differences in nephrotoxicity risk and renal effects among anti-viral therapies against hepatitis B. *Aliment Pharmacol Ther* 2015;41:310–19.
12. Mauss S, Berger F, Filmann N, et al. Effect of HBV polymerase inhibitors on renal function in patients with chronic hepatitis B. *J Hepatol* 2011;55:1235–40.
13. Qi X, Wang JY, Mao RC, Zhang JM. Impact of nucleos(t)ide analogues on the estimated glomerular filtration rate in patients with chronic hepatitis B: a prospective cohort study in China. *J Viral Hepat* 2015;22:46–54.
14. Tien C, Xu JJ, Chan LS, et al. Long-term treatment with tenofovir in Asian-American chronic hepatitis B patients is associated with abnormal renal phosphate handling. *Dig Dis Sci* 2015;60:566–72.
15. Chen YC, Hsu CW, Chang MY, Yeh CT. On-treatment mortality predictors in chronic hepatitis B patients experiencing severe acute exacerbation: a prospective observational study. *BMC Res Notes* 2013;6:349.
16. Cholongitas E, Papatheodoridis GV, Goulis J, Vlachogiannakos J, Karatapanis S, Ketikoglou J, et al. The impact of newer nucleos(t)ide analogues on patients with hepatitis B decompensated cirrhosis. *Ann Gastroenterol* 2015;28:109–17.
17. Nguyen HL, Al-Freah MA, Joe D, et al. A single centre, large 'real-life' cohort treated with tenofovir versus entecavir: no deterioration in renal function in tenofovir cohort

- over 12 months of therapy. *Hepatology* 2011;54:604A.
18. Le ST, Sahhar L, Lim J, et al. Do tenofovir and entecavir affect renal function in patients with chronic hepatitis B (CHB)? A two-year observational study from a single Australian centre. *Hepatology* 2012;56:410A.
  19. Su PY, Yen HH, Hsu YC, Wu SS, Su WW, Soon MS. Renal function for chronic hepatitis B patients treated with nucleoside antivirals-a retrospective study in a medical center. *Hepatology Int* 2013;7:S222.
  20. Lee S, Park JY, Song K, et al. Comparison of the effects of telbivudine and entecavir treatment on estimated glomerular filtration rate in patients with chronic hepatitis B. *Gut and Liver*. 2015;9:776–83.
  21. Hu TH, Chang KC, Tseng PL, Lin MT, Hung CH, Yen YH. A comparison of renal safety of telbivudine entecavir and tenofovir treatment in chronic hepatitis B patients: a single center large "real life" cohort study. *Hepatology Int* 2015;1:S186.
  22. Tsai MC, Hung CH, Chen CH, et al. Comparing the change of renal function of tenofovir and telbivudine naive chronic hepatitis B patients. *Hepatology Int* 2014a;1:S154.
  23. Sriprayoon T. A randomized controlled trial to compare the efficacy and safety of entecavir versus tenofovir treatment in naive chronic hepatitis B patients. *Gastroenterology* 2015;1:S502.
  24. Krastev Z, Kotzev IA, Celen MK, McNeeley D, Hamed KA. Efficacy and safety of telbivudine versus tenofovir treatment based on the Roadmap concept: results from a randomized, controlled trial in HBeAg-negative chronic hepatitis B patients. *Hepatology* 2014;60:1104A.
  25. Hung CH, Chen CH, Lu SN, Hu TH, Wang JH, Lee CM. Tenofovir versus entecavir in the treatment of chronic hepatitis B with severe acute exacerbation. *Hepatology* 2014;60:1118A.
  26. Sun H, Zhang S, Wang M. Efficacy and safety of three different treatments in 183 patients with hepatitis B cirrhosis. *Hepatology Int* 2014;1:S69.
  27. Park H, Park JY, Kim SU, et al. A prospective randomized trial of switching to telbivudine plus adefovir in HBeAg-positive lamivudine-resistant chronic hepatitis B patients who have suboptimal response to lamivudine plus adefovir. *Clin Gastroenterol Hepatol* 2014;12:157.
